# Supplementary material
Source: MDPI journal article supplement (https://www.mdpi.com/2073-4441/12/11/2981)
Supplement: s1 [file s1]

*Supplementary Material*

# Interaction Among Controlling Factors on Riverine DIN Export in Small Mountainous Rivers of Taiwan: Inseparable Human-Landscape System

Wen-Shiuan Lee <sup>1</sup>, Jr-Chuan Huang <sup>1,\*</sup>, Chung-Te Chang <sup>2,\*</sup>, Shih-Chien Chan <sup>3</sup>, Ying-San Liou <sup>4</sup>, Chien-Sen Liao <sup>5</sup>, Li-Chin Lee <sup>1</sup>, Jun-Yi Lee <sup>1</sup>, Yu-Ting Shih <sup>1</sup>, Meng-Chang Lu <sup>1</sup>, Pei-Hao Chen <sup>1</sup>

<sup>1</sup> Department of Geography, National Taiwan University, Taipei 10617, Taiwan; b06208033@ntu.edu.tw (W.-S.L.); d04228001@ntu.edu.tw (L.-C.L.); d02228001@ntu.edu.tw (J.-Y.L.); d00228003@ntu.edu.tw (Y.-T.S.); b99208035@ntu.edu.tw (M.-C.L.); d06228001@ntu.edu.tw (P.-H.C.)

<sup>2</sup> Center for Ecology and Environment, Tunghai University, Taichung 40799, Taiwan

<sup>3</sup> Department of Geography, National Changhua University of Education, Changhua 50074, Taiwan; scchan@cc.ncue.edu.tw (S.-C.C.)

<sup>4</sup> Department of Natural Resources and Environmental Studies, National Dong-Hwa University, Hualien 974301, Taiwan; yingsan@gms.ndhu.edu.tw (Y.-S.L.)

<sup>5</sup> Department of Civil and Ecological Engineering, I-Shou University, Kaohsiung 84001, Taiwan; csliao@isu.edu.tw (C.-S.L.)

\* Correspondence: riverhuang@ntu.edu.tw (J.-C.H.); chungtechang@thu.edu.tw (C.-T.C.)

Received: 21 September 2020; Accepted: 21 October 2020; Published: date

**Table S1.** The basic landscape characteristics of the 43 sampling sites.

| Station Name         | Watershed characteristic |                     |               |              |                  | Land use |       |         |
|----------------------|--------------------------|---------------------|---------------|--------------|------------------|----------|-------|---------|
|                      | Area                     | Average Temperature | Average Slope | Average Flow | Average Rainfall | Forest   | Agri. | Buildup |
|                      | (km <sup>2</sup> )       | (°C)                | (%)           | (mm)         | (mm)             | (%)      | (%)   | (%)     |
| 1. Wu-Tu             | 198                      | 20.9                | 35            | 4258         | 4857             | 83       | 3     | 8       |
| 2. Po-Bridge         | 111                      | 21.6                | 39            | 3876         | 3988             | 76       | 8     | 11      |
| 3. San-Hsia          | 126                      | 20.8                | 44            | 2122         | 2733             | 80       | 13    | 4       |
| 4. Hsin-Pu           | 210                      | 21.2                | 26            | 1411         | 2031             | 60       | 21    | 9       |
| 5. Nei-Wan           | 147                      | 20.0                | 54            | 2961         | 3001             | 90       | 4     | 2       |
| 6. Shang-Ping        | 212                      | 17.1                | 61            | 2200         | 2770             | 93       | 3     | 1       |
| 7. Ping-An-Bridge    | 297                      | 20.1                | 42            | 1485         | 2254             | 80       | 10    | 4       |
| 8. Yun-Hsin-Chou     | 146                      | 19.0                | 54            | 2264         | 2767             | 92       | 3     | 1       |
| 9. Pei-Shih Bridge   | 475                      | 19.7                | 41            | 842          | 1591             | 74       | 14    | 5       |
| 10. I-Li             | 629                      | 16.5                | 64            | 976          | 1759             | 83       | 6     | 1       |
| 11. Lung-An Bridge   | 969                      | 15.5                | 69            | 848          | 2347             | 86       | 6     | 1       |
| 12. Chi-Nan Bridge   | 266                      | 21.4                | 26            | 1616         | 1840             | 42       | 29    | 18      |
| 13. Yu-Feng Bridge   | 2096                     | 18.3                | 67            | 1682         | 2443             | 85       | 4     | 1       |
| 14. Chi-Chou Bridge  | 2969                     | 18.7                | 59            | 1093         | 2023             | 76       | 10    | 2       |
| 15. Pei-Kang-2       | 220                      | 22.1                | 9             | 1704         | 2275             | 18       | 53    | 18      |
| 16. Tun-Kun Bridge   | 578                      | 22.0                | 8             | 1068         | 1765             | 12       | 65    | 15      |
| 17. Chun-Huei Bridge | 115                      | 19.2                | 42            | 2061         | 3131             | 58       | 26    | 5       |
| 18. Chu-Kuo          | 81                       | 18.5                | 53            | 2800         | 3607             | 70       | 21    | 2       |
| 19. Ho-Sung Bridge   | 440                      | 21.2                | 20            | 3111         | 3768             | 23       | 57    | 10      |
| 20. Shin-Ying        | 225                      | 22.3                | 19            | 1786         | 2840             | 36       | 47    | 7       |
| 21. Yu-Tien          | 159                      | 22.1                | 37            | 1077         | 2413             | 68       | 21    | 2       |
| 22. Hsin-Shih        | 142                      | 23.4                | 11            | 1500         | 2612             | 33       | 42    | 14      |
| 23. A-Lien-2         | 176                      | 23.6                | 21            | 1724         | 2943             | 59       | 21    | 5       |
| 24. Chung-Te         | 140                      | 23.6                | 21            | 1903         | 3024             | 57       | 22    | 5       |
| 25. Li-Lin Bridge    | 2869                     | 20.3                | 54            | 1879         | 3546             | 77       | 12    | 2       |
| 26. Liu-Kwei         | 890                      | 18.1                | 65            | 2600         | 3870             | 85       | 4     | 1       |
| 28. San-Ti-Men       | 409                      | 21.8                | 65            | 3542         | 4737             | 93       | 2     | 1       |
| 31. Chih-Pen         | 164                      | 23.4                | 58            | 2223         | 3592             | 93       | 3     | 1       |
| 32. Li-Chia          | 147                      | 20.2                | 63            | 2121         | 3856             | 95       | 1     | 0       |
| 33. Tai-Tung Bridge  | 1574                     | 17.5                | 56            | 1685         | 3680             | 59       | 19    | 1       |
| 34. Yen-Ping         | 469                      | 18.0                | 64            | 1740         | 3388             | 69       | 10    | 0       |
| 35. Hsin-Wu-Lu       | 628                      | 16.1                | 64            | 2021         | 3208             | 60       | 17    | 0       |
| 36. Yu-Li Bridge     | 999                      | 19.9                | 57            | 1754         | 2889             | 81       | 8     | 1       |
| 37. Jui-Sui Bridge   | 1528                     | 20.4                | 55            | 2463         | 3367             | 80       | 9     | 1       |
| 38. His-Po Bridge    | 240                      | 20.7                | 69            | 2495         | 4084             | 88       | 1     | 0       |
| 39. Ping-Lin         | 210                      | 20.1                | 76            | 1330         | 3015             | 87       | 1     | 0       |
| 40. Jen-Shou Bridge  | 441                      | 17.0                | 71            | 2181         | 3358             | 90       | 1     | 0       |
| 41. Hua-Lien Bridge  | 1497                     | 19.8                | 57            | 2876         | 4044             | 76       | 11    | 2       |
| 42. Lu-Shui          | 433                      | 14.9                | 74            | 3129         | 3667             | 90       | 1     | 0       |
| 43. Chi-Neng-Pu      | 536                      | 17.6                | 67            | 2983         | 3524             | 91       | 0     | 0       |
| 44. Jhong-Yue        | 136                      | 21.2                | 60            | 3156         | 3052             | 95       | 2     | 0       |
| 45. Niu-Tou          | 453                      | 15.0                | 60            | 1788         | 3059             | 89       | 2     | 0       |
| 46. Lan-Yang Bridge  | 823                      | 17.3                | 50            | 2361         | 3111             | 79       | 9     | 2       |

The Agri. indicates agriculture.

**Table S2.** Estimated annual and seasonal DIN, NO<sub>3</sub><sup>-</sup> and NH<sub>4</sub><sup>+</sup> concentrations for 43 sampling sites in 2015 (unit: mg-N L<sup>-1</sup>).

| 2015<br>Station Name | DIN    |      |      | NO <sub>3</sub> <sup>-</sup> |      |      | NH <sub>4</sub> <sup>+</sup> |      |      |
|----------------------|--------|------|------|------------------------------|------|------|------------------------------|------|------|
|                      | Annual | Dry  | Wet  | Annual                       | Dry  | Wet  | Annual                       | Dry  | Wet  |
| 1. Wu-Tu             | 2.51   | 2.77 | 2.31 | 1.36                         | 1.55 | 1.20 | 1.04                         | 1.07 | 1.02 |
| 2. Po-Bridge         | 2.25   | 2.87 | 2.10 | 1.19                         | 1.26 | 1.18 | 0.96                         | 1.43 | 0.84 |
| 3. San-Hsia          | 2.27   | 1.96 | 2.31 | 1.45                         | 0.59 | 1.59 | 0.76                         | 1.24 | 0.69 |
| 4. Hsin-Pu           | 2.09   | 2.54 | 1.98 | 1.55                         | 1.93 | 1.45 | 0.46                         | 0.49 | 0.45 |
| 5. Nei-Wan           | 0.91   | 0.67 | 0.94 | 0.77                         | 0.63 | 0.80 | 0.13                         | 0.04 | 0.15 |
| 6. Shang-Ping        | 0.66   | 0.44 | 0.73 | 0.64                         | 0.39 | 0.71 | 0.03                         | 0.05 | 0.02 |
| 7. Ping-An-Bridge    | 1.08   | 0.75 | 1.10 | 0.89                         | 0.61 | 0.91 | 0.14                         | 0.08 | 0.14 |
| 8. Yun-Hsin-Chou     | 0.80   | 0.62 | 0.84 | 0.79                         | 0.61 | 0.83 | 0.01                         | 0.01 | 0.01 |
| 9. Pei-Shih Bridge   | 2.12   | 2.99 | 2.06 | 1.51                         | 1.42 | 1.52 | 0.50                         | 1.33 | 0.44 |
| 10. I-Li             | 1.57   | 1.73 | 1.56 | 1.47                         | 1.45 | 1.48 | 0.05                         | 0.27 | 0.03 |
| 11. Lung-An Bridge   | 1.38   | 0.97 | 1.48 | 1.18                         | 0.62 | 1.31 | 0.19                         | 0.34 | 0.16 |
| 12. Chi-Nan Bridge   | 4.15   | 4.94 | 3.74 | 2.20                         | 2.07 | 2.27 | 1.65                         | 2.51 | 1.20 |
| 13. Yu-Feng Bridge   | 0.96   | 0.80 | 1.03 | 0.60                         | 0.41 | 0.67 | 0.34                         | 0.35 | 0.33 |
| 14. Chi-Chou Bridge  | 2.06   | 1.47 | 2.11 | 1.28                         | 0.44 | 1.35 | 0.74                         | 0.96 | 0.72 |
| 15. Pei-Kang-2       | 5.68   | 6.61 | 5.40 | 1.64                         | 1.26 | 1.75 | 3.78                         | 5.13 | 3.37 |
| 16. Tun-Kun Bridge   | 8.87   | 7.58 | 9.51 | 2.66                         | 1.22 | 3.39 | 4.59                         | 6.14 | 3.81 |
| 17. Chun-Huei Bridge | 2.01   | 2.47 | 1.96 | 1.40                         | 1.07 | 1.43 | 0.57                         | 1.29 | 0.49 |
| 18. Chu-Kuo          | 2.25   | 4.81 | 2.06 | 1.60                         | 0.31 | 1.70 | 0.65                         | 4.50 | 0.36 |
| 19. Ho-Sung Bridge   | 3.07   | 5.27 | 2.91 | 1.62                         | 1.27 | 1.64 | 1.18                         | 3.46 | 1.01 |
| 20. Shin-Ying        | 3.85   | 4.94 | 3.63 | 2.20                         | 1.69 | 2.30 | 1.42                         | 2.95 | 1.11 |
| 21. Yu-Tien          | 2.00   | 1.36 | 2.03 | 1.92                         | 1.29 | 1.95 | 0.03                         | 0.02 | 0.03 |
| 22. Hsin-Shih        | 4.99   | 9.74 | 4.37 | 1.17                         | 0.46 | 1.26 | 3.35                         | 9.13 | 2.59 |
| 23. A-Lien-2         | 3.95   | 6.70 | 3.67 | 1.15                         | 0.90 | 1.18 | 2.52                         | 5.37 | 2.23 |
| 24. Chung-Te         | 4.73   | 6.74 | 4.56 | 1.38                         | 1.17 | 1.40 | 2.99                         | 4.98 | 2.82 |
| 25. Li-Lin Bridge    | 0.76   | 0.83 | 0.75 | 0.67                         | 0.66 | 0.68 | 0.05                         | 0.09 | 0.04 |
| 26. Liu-Kwei         | 0.43   | 0.24 | 0.47 | 0.40                         | 0.22 | 0.45 | 0.02                         | 0.02 | 0.02 |
| 28. San-Ti-Men       | 0.81   | 0.16 | 0.82 | 0.77                         | 0.14 | 0.79 | 0.03                         | 0.01 | 0.04 |
| 31. Chih-Pen         | 0.55   | 0.45 | 0.60 | 0.41                         | 0.29 | 0.46 | 0.11                         | 0.11 | 0.11 |
| 32. Li-Chia          | 0.57   | 0.37 | 0.63 | 0.55                         | 0.35 | 0.61 | 0.01                         | 0.01 | 0.01 |
| 33. Tai-Tung Bridge  | 0.73   | 0.61 | 0.78 | 0.65                         | 0.52 | 0.70 | 0.05                         | 0.05 | 0.05 |
| 34. Yen-Ping         | 0.50   | 0.42 | 0.53 | 0.37                         | 0.28 | 0.42 | 0.10                         | 0.11 | 0.09 |
| 35. Hsin-Wu-Lu       | 0.39   | 0.35 | 0.41 | 0.32                         | 0.29 | 0.33 | 0.04                         | 0.04 | 0.05 |
| 36. Yu-Li Bridge     | 0.53   | 0.48 | 0.56 | 0.46                         | 0.43 | 0.48 | 0.06                         | 0.05 | 0.08 |
| 37. Jui-Sui Bridge   | 0.53   | 0.54 | 0.52 | 0.45                         | 0.44 | 0.45 | 0.04                         | 0.06 | 0.03 |
| 38. His-Po Bridge    | 0.58   | 0.59 | 0.58 | 0.46                         | 0.45 | 0.46 | 0.09                         | 0.11 | 0.07 |
| 39. Ping-Lin         | 0.35   | 0.32 | 0.36 | 0.33                         | 0.30 | 0.34 | 0.02                         | 0.02 | 0.02 |
| 40. Jen-Shou Bridge  | 0.42   | 0.36 | 0.43 | 0.39                         | 0.33 | 0.41 | 0.02                         | 0.03 | 0.02 |
| 41. Hua-Lien Bridge  | 0.81   | 0.81 | 0.81 | 0.73                         | 0.72 | 0.73 | 0.04                         | 0.05 | 0.04 |
| 42. Lu-Shui          | 0.47   | 0.36 | 0.52 | 0.45                         | 0.34 | 0.50 | 0.02                         | 0.02 | 0.02 |
| 43. Chi-Neng-Pu      | 0.84   | 0.73 | 0.88 | 0.30                         | 0.27 | 0.30 | 0.54                         | 0.44 | 0.57 |
| 44. Jhong-Yue        | 0.46   | 0.36 | 0.48 | 0.43                         | 0.35 | 0.46 | 0.02                         | 0.01 | 0.02 |
| 45. Niu-Tou          | 0.58   | 0.46 | 0.62 | 0.56                         | 0.44 | 0.59 | 0.02                         | 0.01 | 0.02 |
| 46. Lan-Yang Bridge  | 1.09   | 1.25 | 1.01 | 0.61                         | 0.62 | 0.60 | 0.45                         | 0.58 | 0.39 |

**Table S3.** Estimated annual and seasonal DIN, NO<sub>3</sub><sup>-</sup> and NH<sub>4</sub><sup>+</sup> concentrations for 43 sampling sites in 2016 (unit: mg-N L<sup>-1</sup>).

| 2016<br>Station Name | DIN    |      |       | NO <sub>3</sub> <sup>-</sup> |      |      | NH <sub>4</sub> <sup>+</sup> |      |      |
|----------------------|--------|------|-------|------------------------------|------|------|------------------------------|------|------|
|                      | Annual | Dry  | Wet   | Annual                       | Dry  | Wet  | Annual                       | Dry  | Wet  |
| 1. Wu-Tu             | 1.93   | 2.05 | 1.83  | 1.20                         | 1.37 | 1.06 | 0.66                         | 0.59 | 0.71 |
| 2. Po-Bridge         | 1.79   | 1.95 | 1.69  | 1.21                         | 1.29 | 1.17 | 0.50                         | 0.57 | 0.45 |
| 3. San-Hsia          | 1.84   | 1.70 | 1.91  | 1.32                         | 1.17 | 1.39 | 0.46                         | 0.48 | 0.44 |
| 4. Hsin-Pu           | 1.55   | 1.68 | 1.47  | 1.31                         | 1.42 | 1.24 | 0.19                         | 0.21 | 0.18 |
| 5. Nei-Wan           | 0.76   | 0.72 | 0.78  | 0.74                         | 0.70 | 0.76 | 0.02                         | 0.02 | 0.02 |
| 6. Shang-Ping        | 0.83   | 0.70 | 0.99  | 0.79                         | 0.68 | 0.93 | 0.04                         | 0.02 | 0.06 |
| 7. Ping-An-Bridge    | 1.05   | 1.03 | 1.06  | 0.93                         | 0.91 | 0.96 | 0.08                         | 0.09 | 0.07 |
| 8. Yun-Hsin-Chou     | 0.80   | 0.79 | 0.82  | 0.79                         | 0.78 | 0.81 | 0.01                         | 0.01 | 0.01 |
| 9. Pei-Shih Bridge   | 1.71   | 1.65 | 1.78  | 1.39                         | 1.39 | 1.39 | 0.22                         | 0.18 | 0.28 |
| 10. I-Li             | 1.26   | 1.23 | 1.28  | 1.21                         | 1.20 | 1.24 | 0.03                         | 0.03 | 0.03 |
| 11. Lung-An Bridge   | 1.56   | 0.88 | 1.75  | 1.37                         | 0.82 | 1.53 | 0.18                         | 0.05 | 0.21 |
| 12. Chi-Nan Bridge   | 3.55   | 3.88 | 3.31  | 2.15                         | 2.15 | 2.15 | 1.15                         | 1.46 | 0.92 |
| 13. Yu-Feng Bridge   | 0.81   | 0.75 | 0.84  | 0.65                         | 0.60 | 0.69 | 0.14                         | 0.14 | 0.14 |
| 14. Chi-Chou Bridge  | 1.45   | 1.12 | 1.55  | 1.24                         | 0.86 | 1.36 | 0.18                         | 0.23 | 0.16 |
| 15. Pei-Kang-2       | 4.61   | 4.75 | 4.55  | 1.80                         | 1.47 | 1.94 | 2.56                         | 3.05 | 2.34 |
| 16. Tun-Kun Bridge   | 8.91   | 6.39 | 10.45 | 2.79                         | 1.50 | 3.58 | 3.49                         | 4.66 | 2.78 |
| 17. Chun-Huei Bridge | 1.77   | 2.05 | 1.72  | 1.40                         | 1.31 | 1.42 | 0.34                         | 0.68 | 0.28 |
| 18. Chu-Kuo          | 1.90   | 1.17 | 2.03  | 1.69                         | 0.63 | 1.89 | 0.20                         | 0.54 | 0.14 |
| 19. Ho-Sung Bridge   | 2.85   | 3.92 | 2.60  | 1.67                         | 1.51 | 1.70 | 0.95                         | 2.07 | 0.68 |
| 20. Shin-Ying        | 3.03   | 4.28 | 2.71  | 2.08                         | 2.19 | 2.05 | 0.75                         | 1.82 | 0.49 |
| 21. Yu-Tien          | 1.36   | 1.27 | 1.37  | 1.31                         | 1.23 | 1.31 | 0.04                         | 0.02 | 0.04 |
| 22. Hsin-Shih        | 4.24   | 5.62 | 3.94  | 1.38                         | 1.03 | 1.46 | 2.21                         | 4.30 | 1.75 |
| 23. A-Lien-2         | 2.89   | 3.87 | 2.71  | 1.18                         | 1.11 | 1.19 | 1.45                         | 2.51 | 1.26 |
| 24. Chung-Te         | 2.94   | 3.87 | 2.79  | 1.36                         | 1.18 | 1.39 | 1.32                         | 2.40 | 1.15 |
| 25. Li-Lin Bridge    | 0.73   | 0.60 | 0.76  | 0.67                         | 0.52 | 0.69 | 0.05                         | 0.06 | 0.05 |
| 26. Liu-Kwei         | 0.37   | 0.29 | 0.42  | 0.34                         | 0.25 | 0.38 | 0.03                         | 0.03 | 0.03 |
| 28. San-Ti-Men       | 0.83   | 0.40 | 0.87  | 0.77                         | 0.36 | 0.81 | 0.05                         | 0.03 | 0.05 |
| 31. Chih-Pen         | 0.58   | 0.38 | 0.63  | 0.51                         | 0.29 | 0.56 | 0.06                         | 0.07 | 0.06 |
| 32. Li-Chia          | 0.54   | 0.36 | 0.57  | 0.52                         | 0.34 | 0.55 | 0.02                         | 0.01 | 0.02 |
| 33. Tai-Tung Bridge  | 0.69   | 0.61 | 0.71  | 0.57                         | 0.53 | 0.58 | 0.10                         | 0.05 | 0.11 |
| 34. Yen-Ping         | 0.44   | 0.35 | 0.46  | 0.35                         | 0.25 | 0.38 | 0.08                         | 0.08 | 0.08 |
| 35. Hsin-Wu-Lu       | 0.35   | 0.31 | 0.37  | 0.26                         | 0.25 | 0.26 | 0.09                         | 0.05 | 0.10 |
| 36. Yu-Li Bridge     | 0.51   | 0.45 | 0.52  | 0.46                         | 0.41 | 0.47 | 0.05                         | 0.04 | 0.05 |
| 37. Jui-Sui Bridge   | 0.47   | 0.49 | 0.47  | 0.43                         | 0.42 | 0.43 | 0.03                         | 0.04 | 0.03 |
| 38. His-Po Bridge    | 0.39   | 0.45 | 0.36  | 0.30                         | 0.35 | 0.27 | 0.07                         | 0.08 | 0.07 |
| 39. Ping-Lin         | 0.28   | 0.28 | 0.28  | 0.26                         | 0.26 | 0.25 | 0.02                         | 0.02 | 0.02 |
| 40. Jen-Shou Bridge  | 0.31   | 0.31 | 0.31  | 0.29                         | 0.29 | 0.29 | 0.01                         | 0.01 | 0.01 |
| 41. Hua-Lien Bridge  | 0.74   | 0.74 | 0.74  | 0.67                         | 0.68 | 0.67 | 0.05                         | 0.04 | 0.06 |
| 42. Lu-Shui          | 0.45   | 0.38 | 0.48  | 0.42                         | 0.36 | 0.45 | 0.02                         | 0.02 | 0.02 |
| 43. Chi-Neng-Pu      | 0.44   | 0.33 | 0.47  | 0.26                         | 0.22 | 0.27 | 0.17                         | 0.11 | 0.19 |
| 44. Jhong-Yue        | 0.46   | 0.30 | 0.50  | 0.44                         | 0.28 | 0.48 | 0.02                         | 0.01 | 0.02 |
| 45. Niu-Tou          | 0.56   | 0.49 | 0.61  | 0.54                         | 0.47 | 0.59 | 0.01                         | 0.01 | 0.01 |
| 46. Lan-Yang Bridge  | 0.71   | 0.68 | 0.73  | 0.60                         | 0.57 | 0.61 | 0.09                         | 0.08 | 0.10 |

**Table S4.** Estimated annual and seasonal DIN, NO<sub>3</sub><sup>−</sup> and NH<sub>4</sub><sup>+</sup> exports for 43 sampling sites in 2015 (unit: kg-N km<sup>−2</sup> yr<sup>−1</sup>).

| 2015<br>Station Name | DIN      |         |         | NO <sub>3</sub> <sup>−</sup> |         |         | NH <sub>4</sub> <sup>+</sup> |         |         |
|----------------------|----------|---------|---------|------------------------------|---------|---------|------------------------------|---------|---------|
|                      | Annual   | Dry     | Wet     | Annual                       | Dry     | Wet     | Annual                       | Dry     | Wet     |
| 1. Wu-Tu             | 9716.71  | 4730.03 | 4986.69 | 5251.62                      | 2657.45 | 2594.17 | 4032.04                      | 1823.26 | 2208.78 |
| 2. Po-Bridge         | 8149.36  | 2051.85 | 6097.51 | 4324.16                      | 897.03  | 3427.13 | 3457.11                      | 1024.81 | 2432.30 |
| 3. San-Hsia          | 4596.03  | 532.95  | 4063.08 | 2945.93                      | 160.76  | 2785.17 | 1543.94                      | 335.89  | 1208.05 |
| 4. Hsin-Pu           | 2148.27  | 533.99  | 1614.28 | 1587.06                      | 405.15  | 1181.91 | 471.97                       | 103.04  | 368.92  |
| 5. Nei-Wan           | 2777.96  | 264.68  | 2513.28 | 2364.10                      | 248.57  | 2115.53 | 404.55                       | 14.90   | 389.65  |
| 6. Shang-Ping        | 1135.58  | 174.50  | 961.08  | 1085.60                      | 155.19  | 930.41  | 44.13                        | 18.01   | 26.12   |
| 7. Ping-An-Bridge    | 1140.62  | 41.08   | 1099.55 | 942.43                       | 33.36   | 909.07  | 149.36                       | 4.48    | 144.88  |
| 8. Yun-Hsin-Chou     | 1401.07  | 171.11  | 1229.96 | 1381.66                      | 167.76  | 1213.89 | 14.10                        | 2.50    | 11.60   |
| 9. Pei-Shih Bridge   | 1289.23  | 114.12  | 1175.10 | 921.65                       | 54.06   | 867.60  | 302.71                       | 50.53   | 252.18  |
| 10. I-Li             | 1500.99  | 115.70  | 1385.29 | 1406.19                      | 96.47   | 1309.71 | 49.19                        | 18.13   | 31.06   |
| 11. Lung-An Bridge   | 857.85   | 118.90  | 738.95  | 730.99                       | 76.38   | 654.61  | 120.63                       | 42.06   | 78.57   |
| 12. Chi-Nan Bridge   | 5703.13  | 2319.58 | 3383.55 | 3031.06                      | 973.38  | 2057.68 | 2262.53                      | 1179.46 | 1083.07 |
| 13. Yu-Feng Bridge   | 956.11   | 234.62  | 721.49  | 591.48                       | 120.87  | 470.61  | 332.82                       | 103.17  | 229.64  |
| 14. Chi-Chou Bridge  | 1467.35  | 78.32   | 1389.03 | 909.48                       | 23.23   | 886.25  | 526.75                       | 50.96   | 475.79  |
| 15. Pei-Kang-2       | 8655.88  | 2336.25 | 6319.63 | 2495.31                      | 446.42  | 2048.90 | 5757.24                      | 1815.02 | 3942.21 |
| 16. Tun-Kun Bridge   | 10228.53 | 2928.19 | 7300.34 | 3069.35                      | 471.44  | 2597.91 | 5295.93                      | 2372.08 | 2923.85 |
| 17. Chun-Huei Bridge | 3993.16  | 460.76  | 3532.39 | 2776.41                      | 199.98  | 2576.43 | 1125.29                      | 239.93  | 885.36  |
| 18. Chu-Kuo          | 5676.69  | 855.25  | 4821.44 | 4037.10                      | 55.22   | 3981.88 | 1630.81                      | 798.61  | 832.20  |
| 19. Ho-Sung Bridge   | 8423.14  | 1014.76 | 7408.38 | 4430.78                      | 244.68  | 4186.10 | 3227.25                      | 665.71  | 2561.54 |
| 20. Shin-Ying        | 5348.58  | 1156.47 | 4192.11 | 3052.76                      | 395.20  | 2657.56 | 1968.95                      | 689.68  | 1279.27 |
| 21. Yu-Tien          | 1351.23  | 38.85   | 1312.38 | 1297.32                      | 36.90   | 1260.42 | 22.29                        | 0.57    | 21.73   |
| 22. Hsin-Shih        | 3372.15  | 760.94  | 2611.21 | 786.61                       | 35.71   | 750.90  | 2259.05                      | 713.22  | 1545.83 |
| 23. A-Lien-2         | 3510.56  | 555.23  | 2955.33 | 1021.13                      | 74.89   | 946.23  | 2238.02                      | 445.08  | 1792.95 |
| 24. Chung-Te         | 5129.99  | 559.25  | 4570.74 | 1496.72                      | 97.24   | 1399.47 | 3241.01                      | 413.65  | 2827.36 |
| 25. Li-Lin Bridge    | 892.00   | 122.51  | 769.49  | 792.07                       | 97.99   | 694.07  | 59.11                        | 13.92   | 45.19   |
| 26. Liu-Kwei         | 777.39   | 87.37   | 690.02  | 731.07                       | 79.76   | 651.32  | 38.67                        | 6.44    | 32.23   |
| 28. San-Ti-Men       | 2213.22  | 7.82    | 2205.40 | 2108.81                      | 7.13    | 2101.68 | 94.51                        | 0.53    | 93.99   |
| 31. Chih-Pen         | 645.26   | 158.55  | 486.71  | 474.42                       | 102.00  | 372.42  | 127.11                       | 37.65   | 89.46   |
| 32. Li-Chia          | 402.18   | 60.09   | 342.09  | 390.84                       | 57.42   | 333.42  | 9.18                         | 2.17    | 7.01    |
| 33. Tai-Tung Bridge  | 1067.90  | 270.92  | 796.98  | 947.42                       | 231.04  | 716.38  | 74.43                        | 21.91   | 52.52   |
| 34. Yen-Ping         | 463.58   | 123.99  | 339.59  | 347.72                       | 81.08   | 266.64  | 89.85                        | 33.10   | 56.75   |
| 35. Hsin-Wu-Lu       | 416.62   | 124.10  | 292.52  | 342.13                       | 101.70  | 240.42  | 47.35                        | 13.42   | 33.93   |
| 36. Yu-Li Bridge     | 318.93   | 133.68  | 185.25  | 276.05                       | 118.42  | 157.63  | 39.32                        | 13.52   | 25.81   |
| 37. Jui-Sui Bridge   | 778.94   | 239.78  | 539.15  | 658.66                       | 194.73  | 463.93  | 58.52                        | 25.09   | 33.43   |
| 38. His-Po Bridge    | 734.86   | 288.43  | 446.43  | 576.62                       | 218.81  | 357.80  | 107.64                       | 51.71   | 55.93   |
| 39. Ping-Lin         | 227.01   | 23.04   | 203.97  | 212.23                       | 21.52   | 190.71  | 12.83                        | 1.30    | 11.53   |
| 40. Jen-Shou Bridge  | 621.19   | 98.82   | 522.37  | 587.67                       | 90.97   | 496.70  | 28.98                        | 7.02    | 21.96   |

|                     |         |        |         |         |        |        |         |        |        |
|---------------------|---------|--------|---------|---------|--------|--------|---------|--------|--------|
| 41. Hua-Lien Bridge | 1535.52 | 554.04 | 981.48  | 1383.95 | 494.27 | 889.67 | 79.59   | 32.14  | 47.45  |
| 42. Lu-Shui         | 1219.21 | 271.85 | 947.36  | 1159.83 | 254.23 | 905.61 | 51.56   | 15.32  | 36.24  |
| 43. Chi-Neng-Pu     | 1813.06 | 366.13 | 1446.93 | 637.16  | 137.60 | 499.56 | 1155.22 | 223.62 | 931.59 |
| 44. Jhong-Yue       | 1039.55 | 195.86 | 843.69  | 989.74  | 186.49 | 803.24 | 42.86   | 7.73   | 35.14  |
| 45. Niu-Tou         | 796.83  | 134.19 | 662.64  | 767.89  | 128.95 | 638.94 | 21.80   | 4.21   | 17.60  |
| 46. Lan-Yang Bridge | 2610.60 | 958.63 | 1651.97 | 1459.61 | 477.56 | 982.05 | 1085.13 | 446.47 | 638.67 |

---

**Table S5.** Estimated annual and seasonal DIN, NO<sub>3</sub><sup>−</sup> and NH<sub>4</sub><sup>+</sup> exports for 43 sampling sites in 2016 (unit: kg-N km<sup>−2</sup> yr<sup>−1</sup>).

| 2016<br>Station Name | DIN     |         |         | NO <sub>3</sub> <sup>−</sup> |         |         | NH <sub>4</sub> <sup>+</sup> |         |         |
|----------------------|---------|---------|---------|------------------------------|---------|---------|------------------------------|---------|---------|
|                      | Annual  | Dry     | Wet     | Annual                       | Dry     | Wet     | Annual                       | Dry     | Wet     |
| 1. Wu-Tu             | 8969.66 | 4368.11 | 4601.55 | 5588.05                      | 2917.20 | 2670.85 | 3057.74                      | 1266.15 | 1791.59 |
| 2. Po-Bridge         | 7398.15 | 3091.21 | 4306.94 | 5018.76                      | 2042.00 | 2976.76 | 2064.52                      | 910.54  | 1153.98 |
| 3. San-Hsia          | 4087.80 | 1134.80 | 2953.00 | 2928.48                      | 779.03  | 2149.45 | 1008.39                      | 320.66  | 687.73  |
| 4. Hsin-Pu           | 2788.76 | 1222.67 | 1566.09 | 2358.99                      | 1034.81 | 1324.18 | 343.33                       | 151.50  | 191.82  |
| 5. Nei-Wan           | 2188.83 | 656.69  | 1532.14 | 2123.12                      | 634.50  | 1488.61 | 56.99                        | 19.42   | 37.57   |
| 6. Shang-Ping        | 2223.44 | 1059.24 | 1164.21 | 2116.83                      | 1028.12 | 1088.71 | 95.50                        | 25.82   | 69.68   |
| 7. Ping-An-Bridge    | 2001.76 | 1023.84 | 977.92  | 1784.31                      | 903.06  | 881.26  | 145.86                       | 84.33   | 61.53   |
| 8. Yun-Hsin-Chou     | 2233.86 | 1032.21 | 1201.65 | 2203.41                      | 1017.87 | 1185.54 | 21.99                        | 10.35   | 11.64   |
| 9. Pei-Shih Bridge   | 1839.54 | 983.85  | 855.69  | 1495.45                      | 827.15  | 668.30  | 240.86                       | 104.50  | 136.35  |
| 10. I-Li             | 1253.49 | 666.02  | 587.47  | 1211.64                      | 645.61  | 566.03  | 31.00                        | 15.28   | 15.71   |
| 11. Lung-An Bridge   | 1672.74 | 207.19  | 1465.55 | 1471.95                      | 194.12  | 1277.83 | 189.57                       | 11.96   | 177.61  |
| 12. Chi-Nan Bridge   | 6602.35 | 3093.40 | 3508.95 | 3997.99                      | 1714.69 | 2283.29 | 2138.87                      | 1164.33 | 974.54  |
| 13. Yu-Feng Bridge   | 1925.92 | 637.74  | 1288.18 | 1551.78                      | 503.19  | 1048.59 | 333.45                       | 118.68  | 214.77  |
| 14. Chi-Chou Bridge  | 2135.77 | 410.36  | 1725.42 | 1824.86                      | 313.57  | 1511.29 | 263.57                       | 85.13   | 178.44  |
| 15. Pei-Kang-2       | 8689.27 | 2724.01 | 5965.27 | 3381.86                      | 841.47  | 2540.39 | 4824.23                      | 1752.17 | 3072.06 |
| 16. Tun-Kun Bridge   | 8753.00 | 2383.04 | 6369.96 | 2744.42                      | 560.30  | 2184.13 | 3432.72                      | 1738.66 | 1694.06 |
| 17. Chun-Huei Bridge | 3775.87 | 634.74  | 3141.13 | 2990.73                      | 405.71  | 2585.01 | 727.57                       | 209.75  | 517.82  |
| 18. Chu-Kuo          | 5845.26 | 558.26  | 5287.00 | 5207.82                      | 299.54  | 4908.28 | 627.92                       | 257.03  | 370.90  |
| 19. Ho-Sung Bridge   | 9923.87 | 2617.95 | 7305.92 | 5801.49                      | 1005.11 | 4796.38 | 3290.64                      | 1380.35 | 1910.30 |
| 20. Shin-Ying        | 6597.14 | 1869.92 | 4727.22 | 4533.52                      | 958.08  | 3575.44 | 1646.04                      | 793.90  | 852.14  |
| 21. Yu-Tien          | 2015.85 | 144.97  | 1870.88 | 1928.94                      | 140.19  | 1788.75 | 58.14                        | 2.42    | 55.71   |
| 22. Hsin-Shih        | 9866.62 | 2339.83 | 7526.79 | 3219.43                      | 427.36  | 2792.07 | 5131.80                      | 1789.08 | 3342.72 |
| 23. A-Lien-2         | 7407.47 | 1558.67 | 5848.80 | 3017.74                      | 446.49  | 2571.26 | 3724.09                      | 1013.29 | 2710.80 |
| 24. Chung-Te         | 7996.46 | 1416.81 | 6579.65 | 3708.44                      | 433.94  | 3274.50 | 3587.16                      | 880.45  | 2706.70 |
| 25. Li-Lin Bridge    | 1895.92 | 224.18  | 1671.74 | 1719.90                      | 192.47  | 1527.43 | 128.42                       | 22.39   | 106.03  |
| 26. Liu-Kwei         | 1265.41 | 329.55  | 935.86  | 1137.47                      | 287.68  | 849.79  | 111.79                       | 36.89   | 74.90   |
| 28. San-Ti-Men       | 3601.51 | 149.80  | 3451.70 | 3357.73                      | 135.50  | 3222.23 | 229.15                       | 12.85   | 216.29  |
| 31. Chih-Pen         | 1909.00 | 223.34  | 1685.66 | 1677.96                      | 173.28  | 1504.68 | 206.32                       | 39.45   | 166.87  |
| 32. Li-Chia          | 1912.49 | 169.83  | 1742.65 | 1843.54                      | 161.85  | 1681.69 | 58.20                        | 6.55    | 51.65   |
| 33. Tai-Tung Bridge  | 2530.44 | 460.47  | 2069.97 | 2091.88                      | 399.07  | 1692.81 | 366.97                       | 41.32   | 325.66  |
| 34. Yen-Ping         | 1217.58 | 203.61  | 1013.97 | 975.90                       | 148.82  | 827.09  | 228.66                       | 49.45   | 179.21  |
| 35. Hsin-Wu-Lu       | 1045.22 | 220.66  | 824.55  | 763.28                       | 177.93  | 585.35  | 267.64                       | 35.99   | 231.65  |
| 36. Yu-Li Bridge     | 1469.58 | 265.64  | 1203.94 | 1321.70                      | 238.85  | 1082.85 | 134.25                       | 23.06   | 111.19  |
| 37. Jui-Sui Bridge   | 1736.30 | 371.29  | 1365.01 | 1559.84                      | 318.24  | 1241.60 | 124.73                       | 33.30   | 91.43   |
| 38. His-Po Bridge    | 1440.55 | 540.30  | 900.24  | 1115.19                      | 421.83  | 693.37  | 272.19                       | 93.87   | 178.32  |
| 39. Ping-Lin         | 564.91  | 129.97  | 434.94  | 516.70                       | 119.07  | 397.62  | 42.06                        | 9.50    | 32.56   |
| 40. Jen-Shou Bridge  | 881.70  | 349.09  | 532.61  | 835.16                       | 330.56  | 504.61  | 37.81                        | 15.08   | 22.73   |
| 41. Hua-Lien Bridge  | 2863.30 | 867.02  | 1996.28 | 2577.31                      | 789.22  | 1788.08 | 195.40                       | 47.53   | 147.87  |

|                        |         |        |         |         |        |         |        |       |        |
|------------------------|---------|--------|---------|---------|--------|---------|--------|-------|--------|
| 42. Lu-Shui            | 1655.20 | 426.72 | 1228.48 | 1565.33 | 403.51 | 1161.83 | 78.65  | 19.78 | 58.87  |
| 43. Chi-Neng-Pu        | 1384.30 | 214.63 | 1169.67 | 819.23  | 143.39 | 675.84  | 541.99 | 67.54 | 474.45 |
| 44. Jhong-Yue          | 1086.77 | 140.09 | 946.68  | 1036.32 | 133.22 | 903.10  | 43.28  | 5.44  | 37.84  |
| 45. Niu-Tou            | 1224.92 | 463.01 | 761.91  | 1186.15 | 447.28 | 738.86  | 29.25  | 12.22 | 17.04  |
| 46. Lan-Yang<br>Bridge | 1641.88 | 647.50 | 994.37  | 1381.13 | 547.98 | 833.15  | 216.21 | 79.70 | 136.51 |

---



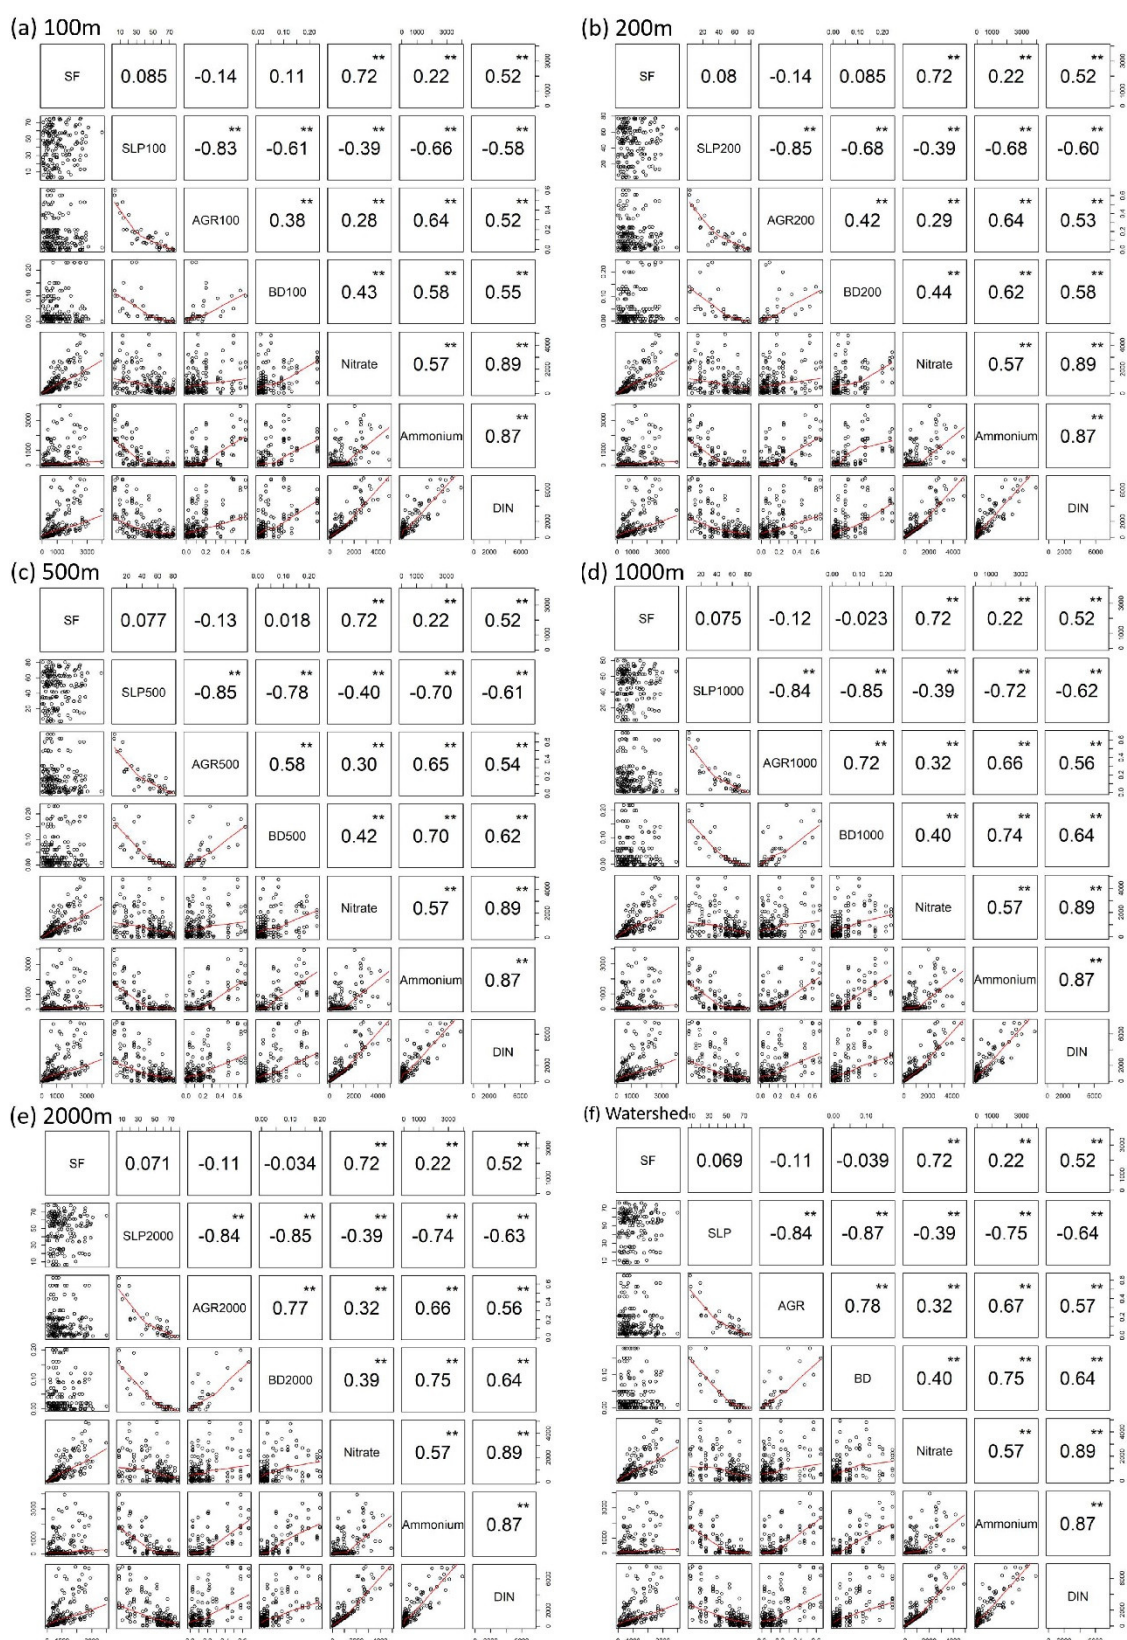

**Figure S1.** Scatterplot matrix among streamflow [SF; mm], slope [SLP; %], the proportion of agriculture [AGR; %], the proportion of buildup [BD; %] of various scales and annual  $\text{NO}_3^-$ , and  $\text{NH}_4^+$ , and DIN exports at (a) 100 m, (b) 200 m, (c) 500 m, (d) 1000 m, (e) 2000 m, and (f) entire watershed scales. The asterisk indicates that the correlation is statistic significant ( $p$ -value: \*\* < 0.01 < \* < 0.05), and the red lines indicate smooth transition regressions.

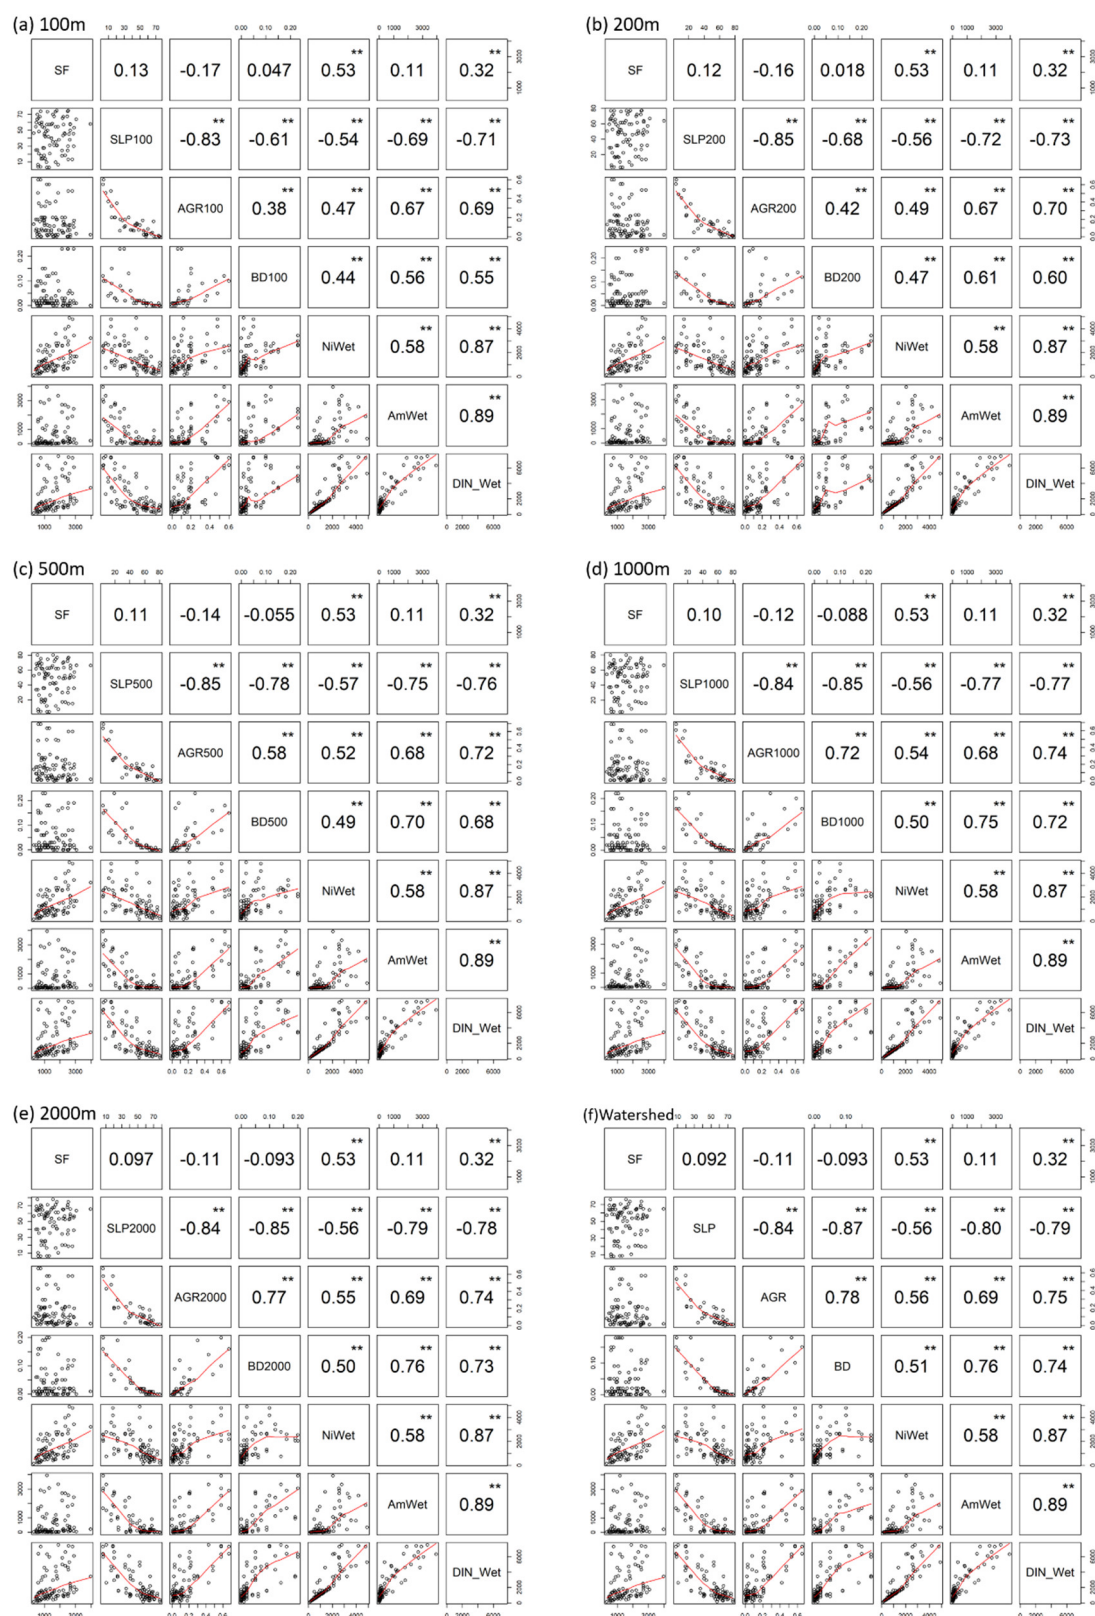

**Figure S2.** Scatterplot matrix among streamflow [SF; mm], slope [SLP; %], the proportion of agriculture [AGR; %], the proportion of buildup [BD; %] of various scales and  $\text{NO}_3^-$  (Ni), and  $\text{NH}_4^+$  (Am), and DIN exports during wet season at (a) 100 m, (b) 200 m, (c) 500 m, (d) 1000 m, (e) 2000 m, and (f) entire watershed scales. The asterisk indicates that the correlation is statistically significant (p-value:  $** < 0.01 < * < 0.05$ ), and the red lines indicate smooth transition regressions.

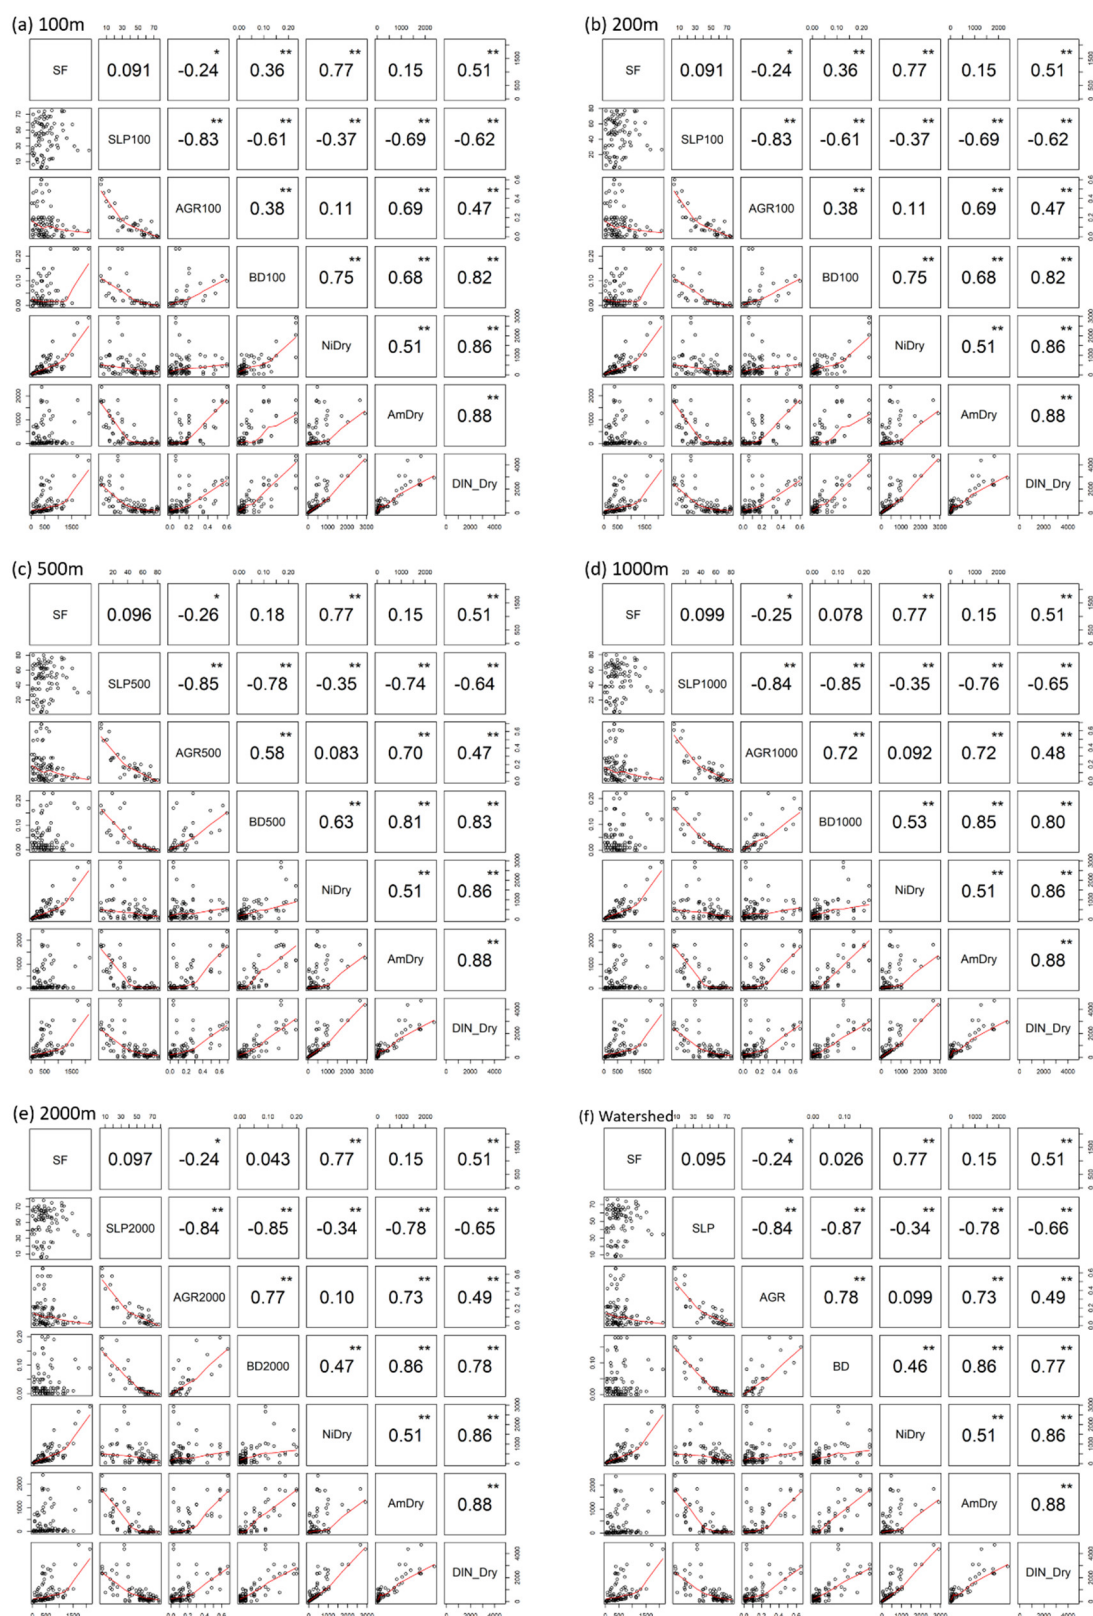

**Figure S3.** Scatterplot matrix among streamflow [SF; mm], slope [SLP; %], the proportion of agriculture [AGR; %], the proportion of buildup [BD; %] of various scales and  $\text{NO}_3^-$  (Ni), and  $\text{NH}_4^+$  (Am), and DIN exports during dry season at ((a) 100 m, (b) 200 m, (c) 500 m, (d) 1000 m, (e) 2000 m, and (f) entire watershed scales. The asterisk indicates that the correlation is statistically significant (p-value:  $** < 0.01 < * < 0.05$ ), and the red lines indicate smooth transition regressions.



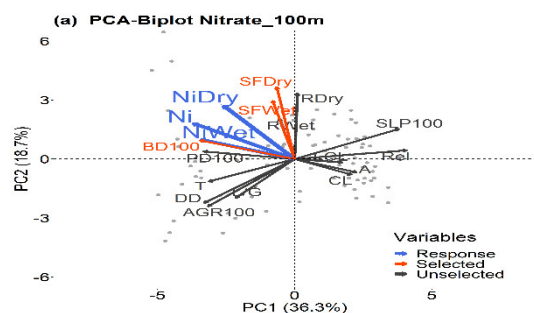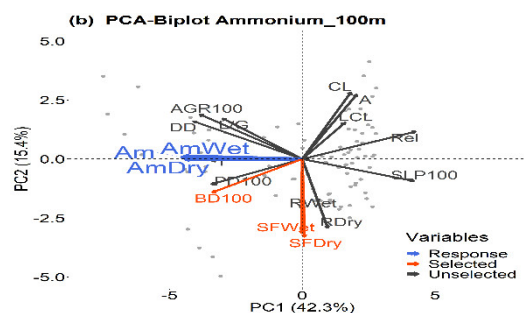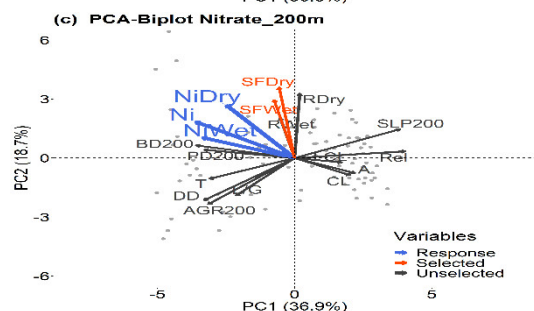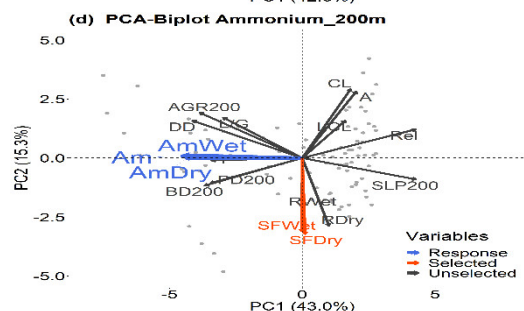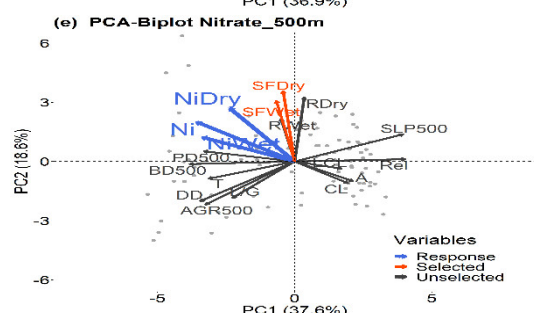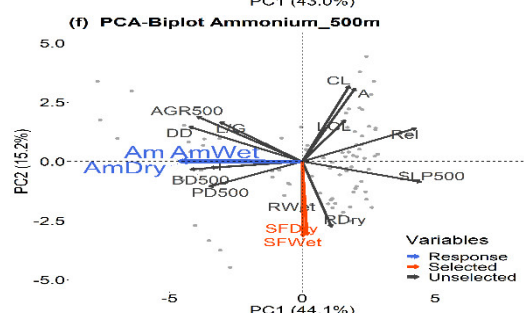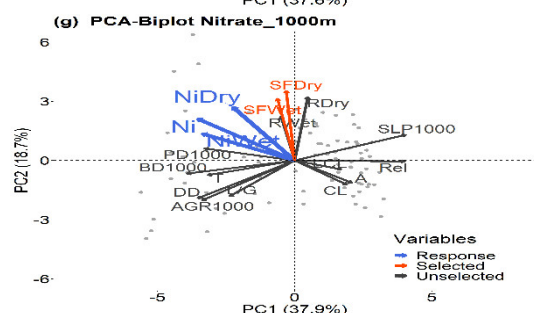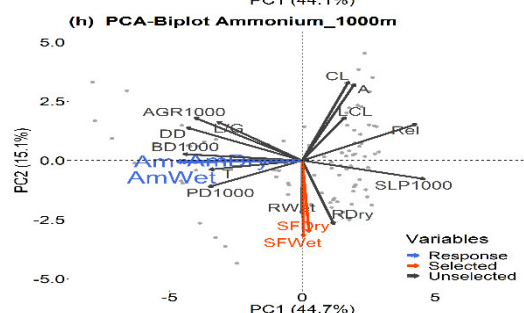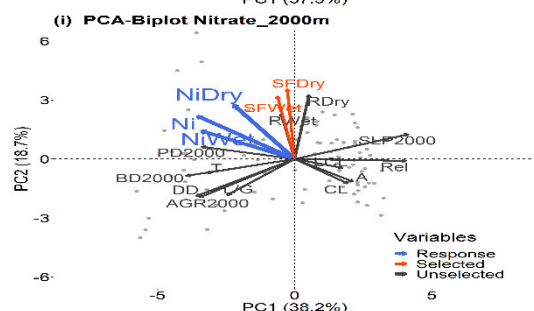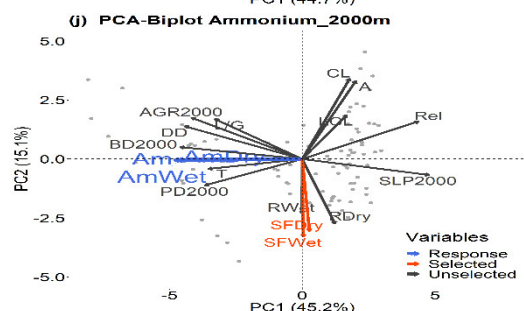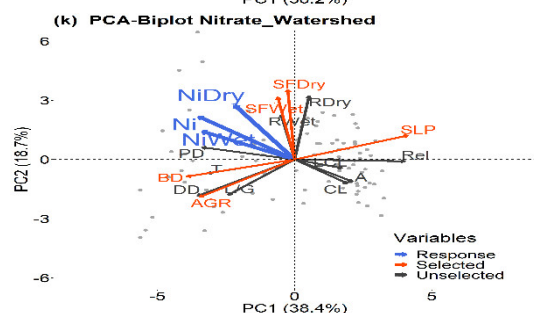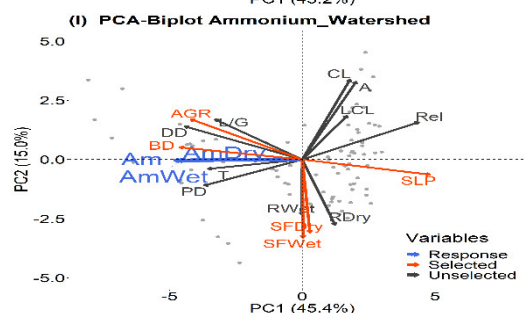

**Figure S4.** Principal components analysis of environmental variables for 43 catchments (gray dots) for  $\text{NO}_3^-$  export (left panel) and  $\text{NH}_4^+$  export (right panel) at different buffer zones: (a, b) 100 m, (c, d) 200 m, (e, f) 500 m, (g, h) 1000 m, (i, j) 2000 m and (k, l) entire watershed. Red-labeled variables are main components for PC1 and PC2. Blue-labeled variables indicate annual nitrate (Ni), dry season nitrate (NiDry), and wet season nitrate export (NiWet) in (left panel) and annual ammonium (Am), dry season ammonium (AmDry) and wet season ammonium export (AmWet) in (right panel).

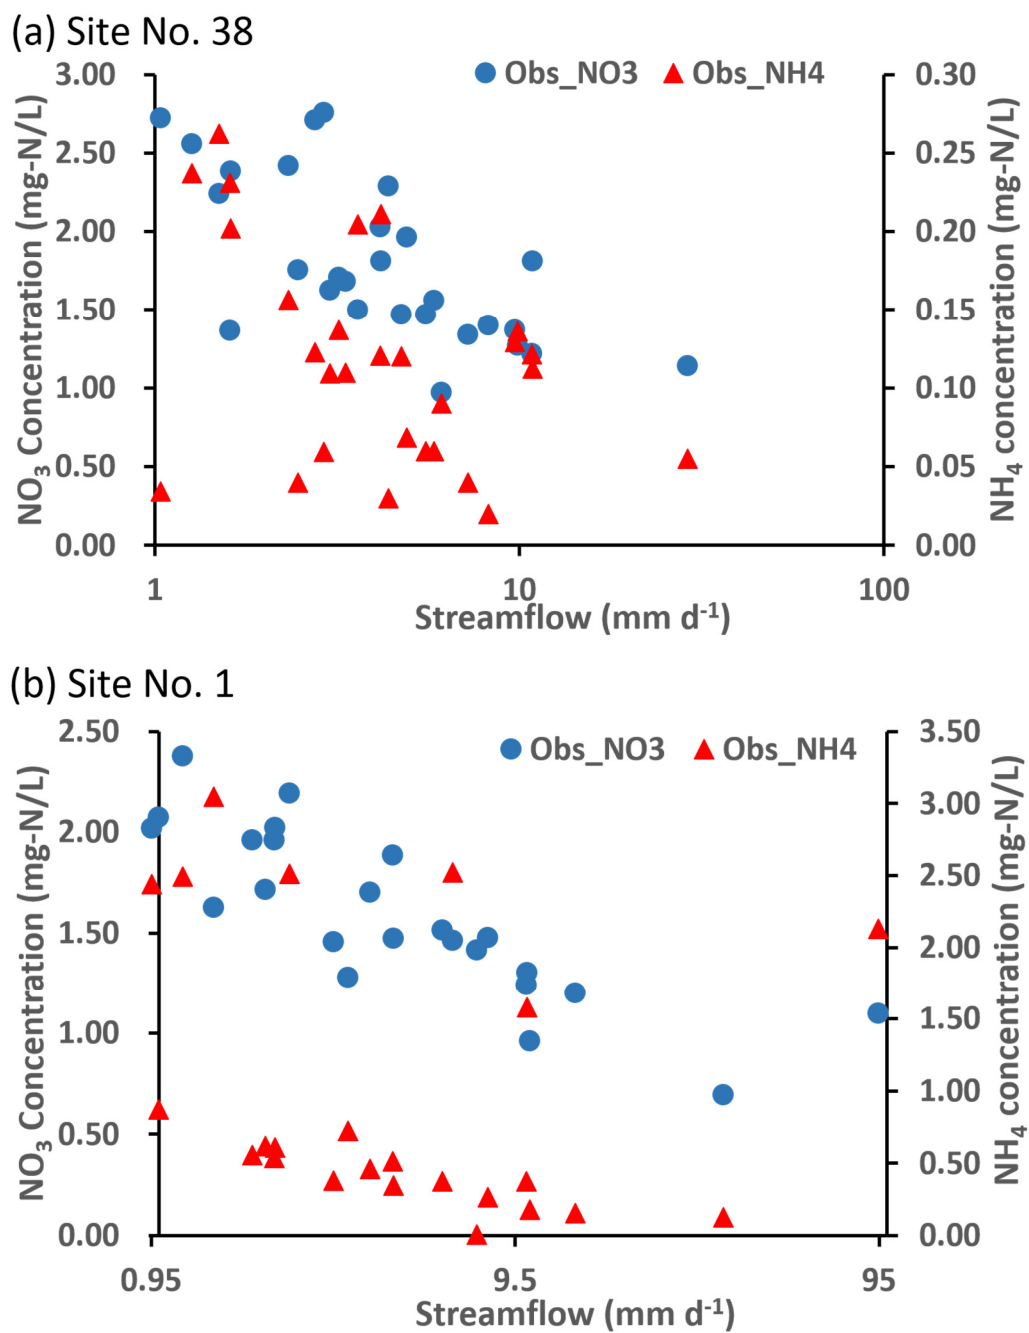

**Figure S5.** The relationship between the observed concentration (y-axis) and the simulated discharge (x-axis) in site no.38 (a) and no.1 (b) during the study period. Obs\_NO3 is the observed NO<sub>3</sub><sup>-</sup> concentration; Obs\_NH4 is the observed NH<sub>4</sub><sup>+</sup> concentration.
